# Supplementary material
Source: publisher site journal article supplement (https://www.dovepress.com/article/105888)
Supplement: Supplementary file 1 [file get_supplementary_file.php%3Ff%3D105888.pdf]

**Table S1.** Codes used to identify patients with immune thrombocytopenia

|                 |                                 |
|-----------------|---------------------------------|
| <b>ICD-9-CM</b> |                                 |
| <b>287.31</b>   | Immune thrombocytopenic purpura |
| <b>287.3x</b>   | Primary thrombocytopenia        |
| <b>287.4x</b>   | Secondary thrombocytopenia      |
| <b>287.5x</b>   | Thrombocytopenia, unspecified   |

ICD-9-CM: International Classification of Diseases, 9<sup>th</sup> Revision, Clinical Modification

**Table S2.** Codes used to exclude patients with secondary thrombocytopenia

| <b>ICD-9-CM</b>              |                                                                                                                      |
|------------------------------|----------------------------------------------------------------------------------------------------------------------|
| <b>795.71</b>                | Nonspecific serologic evidence of human immunodeficiency virus                                                       |
| <b>070.41</b>                | Acute hepatitis C with hepatic coma                                                                                  |
| <b>070.44</b>                | Chronic hepatitis C with hepatic coma                                                                                |
| <b>070.51</b>                | Acute hepatitis C without mention of hepatic coma                                                                    |
| <b>070.54</b>                | Chronic hepatitis C without mention of hepatic coma                                                                  |
| <b>289.81</b>                | Primary hypercoagulable state                                                                                        |
| <b>283.11</b>                | Hemolytic-uremic syndrome                                                                                            |
| <b>710.0</b>                 | Systemic lupus erythematosus                                                                                         |
| <b>070.2</b>                 | Viral hepatitis B with hepatic coma                                                                                  |
| <b>070.3</b>                 | Viral hepatitis B without mention of hepatic coma                                                                    |
| <b>070.7</b>                 | Unspecified viral hepatitis C                                                                                        |
| <b>799.4</b>                 | Cachexia                                                                                                             |
| <b>238.7</b>                 | Neoplasm of uncertain behavior of other lymphatic and hematopoietic tissues<br>(including myelodysplastic syndromes) |
| <b>446.6</b>                 | Thrombotic microangiopathy                                                                                           |
| <b>286.6</b>                 | Defibrination syndrome                                                                                               |
| <b>283.0</b>                 | Autoimmune hemolytic anemias                                                                                         |
| <b>042</b>                   | Human immunodeficiency virus disease                                                                                 |
| <b>V08</b>                   | Asymptomatic human immunodeficiency virus infection status                                                           |
| <b>200-208</b>               | Malignant neoplasm of lymphatic and hematopoietic tissue                                                             |
| <b>140-199 &amp; 209-234</b> | Non-hematological malignancies                                                                                       |

ICD-9-CM: International Classification of Diseases, 9<sup>th</sup> Revision, Clinical Modification

**Table S3.** Codes used to identify bleeding events and rescue therapy

| <b>Bleeding</b> |                                                                                                             |
|-----------------|-------------------------------------------------------------------------------------------------------------|
| <b>ICD-9-CM</b> |                                                                                                             |
| <b>078.6</b>    | Hemorrhagic nephrosonephritis                                                                               |
| <b>246.3</b>    | Hemorrhage and infarction of thyroid                                                                        |
| <b>287.2</b>    | Other nonthrombocytopenic purpuras                                                                          |
| <b>287.8</b>    | Other specified hemorrhagic conditions                                                                      |
| <b>287.9</b>    | Unspecified hemorrhagic conditions                                                                          |
| <b>360.43</b>   | Hemophthalmos, except current injury                                                                        |
| <b>362.43</b>   | Hemorrhagic detachment of retinal pigment epithelium                                                        |
| <b>362.81</b>   | Retinal hemorrhage                                                                                          |
| <b>363.61</b>   | Choroidal hemorrhage, unspecified                                                                           |
| <b>363.62</b>   | Expulsive choroidal hemorrhage                                                                              |
| <b>363.72</b>   | Hemorrhagic choroidal detachment                                                                            |
| <b>372.72</b>   | Conjunctival hemorrhage                                                                                     |
| <b>374.81</b>   | Hemorrhage of eyelid                                                                                        |
| <b>376.32</b>   | Orbital hemorrhage                                                                                          |
| <b>377.42</b>   | Hemorrhage in optic nerve sheaths                                                                           |
| <b>379.23</b>   | Vitreous hemorrhage                                                                                         |
| <b>380.31</b>   | Hematoma of auricle or pinna                                                                                |
| <b>423.0</b>    | Hemopericardium                                                                                             |
| <b>430</b>      | Subarachnoid hemorrhage                                                                                     |
| <b>431</b>      | Intracerebral hemorrhage                                                                                    |
| <b>432.x</b>    | 432.0 Nontraumatic extradural hemorrhage                                                                    |
|                 | 432.1 Subdural hemorrhage                                                                                   |
|                 | 432.9 Unspecified intracranial hemorrhage                                                                   |
| <b>456.0</b>    | Esophageal varices with bleeding                                                                            |
| <b>456.20</b>   | Esophageal varices in diseases classified elsewhere, with bleeding                                          |
| <b>459.0</b>    | Hemorrhage, unspecified                                                                                     |
| <b>530.21</b>   | Ulcer of esophagus with bleeding                                                                            |
| <b>530.82</b>   | Esophageal hemorrhage                                                                                       |
| <b>531.0x</b>   | 531.00 Acute gastric ulcer with hemorrhage, without mention of obstruction                                  |
|                 | 531.01 Acute gastric ulcer with hemorrhage, with obstruction                                                |
| <b>531.2x</b>   | 531.20 Acute gastric ulcer with hemorrhage and perforation, without mention of obstruction                  |
|                 | 531.21 Acute gastric ulcer with hemorrhage and perforation, with obstruction                                |
| <b>531.4x</b>   | 531.40 Chronic or unspecified gastric ulcer with hemorrhage, without mention of obstruction                 |
|                 | 531.41 Chronic or unspecified gastric ulcer with hemorrhage, with obstruction                               |
| <b>531.6x</b>   | 531.60 Chronic or unspecified gastric ulcer with hemorrhage and perforation, without mention of obstruction |
|                 | 531.61 Chronic or unspecified gastric ulcer with hemorrhage and perforation, with obstruction               |
| <b>532.0x</b>   | 532.00 Acute duodenal ulcer with hemorrhage, without mention of obstruction                                 |
|                 | 532.01 Acute duodenal ulcer with hemorrhage, with obstruction                                               |
| <b>532.2x</b>   | 532.20 Acute duodenal ulcer with hemorrhage and perforation, without mention of obstruction                 |
|                 | 532.21 Acute duodenal ulcer with hemorrhage and perforation, with obstruction                               |
| <b>532.4x</b>   | 532.40 Chronic or unspecified duodenal ulcer with hemorrhage, without mention of obstruction                |

|               |                                                                                                                                                                                                                                                                                                     |
|---------------|-----------------------------------------------------------------------------------------------------------------------------------------------------------------------------------------------------------------------------------------------------------------------------------------------------|
| <b>532.6x</b> | 532.41 Chronic or unspecified duodenal ulcer with hemorrhage, with obstruction<br>532.60 Chronic or unspecified duodenal ulcer with hemorrhage and perforation, without mention of obstruction<br>532.61 Chronic or unspecified duodenal ulcer with hemorrhage and perforation, with obstruction    |
| <b>533.0x</b> | 533.00 Acute peptic ulcer of unspecified site with hemorrhage, without mention of obstruction                                                                                                                                                                                                       |
| <b>533.2x</b> | 533.01 Acute peptic ulcer of unspecified site with hemorrhage, with obstruction<br>533.20 Acute peptic ulcer of unspecified site with hemorrhage and perforation, without mention of obstruction<br>533.21 Acute peptic ulcer of unspecified site with hemorrhage and perforation, with obstruction |
| <b>533.4x</b> | 533.40 Chronic or unspecified peptic ulcer of unspecified site with hemorrhage, without mention of obstruction<br>533.41 Chronic or unspecified peptic ulcer of unspecified site with hemorrhage, with obstruction                                                                                  |
| <b>533.6x</b> | 533.60 Chronic or unspecified peptic ulcer of unspecified site with hemorrhage and perforation, without mention of obstruction<br>533.61 Chronic or unspecified peptic ulcer of unspecified site with hemorrhage and perforation, with obstruction                                                  |
| <b>534.0x</b> | 534.00 Acute gastrojejunal ulcer with hemorrhage, without mention of obstruction<br>534.01 Acute gastrojejunal ulcer, with hemorrhage, with obstruction                                                                                                                                             |
| <b>534.2x</b> | 534.20 Acute gastrojejunal ulcer with hemorrhage and perforation, without mention of obstruction<br>534.21 Acute gastrojejunal ulcer with hemorrhage and perforation, with obstruction                                                                                                              |
| <b>534.4x</b> | 534.40 Chronic or unspecified gastrojejunal ulcer with hemorrhage, without mention of obstruction<br>534.41 Chronic or unspecified gastrojejunal ulcer, with hemorrhage, with obstruction                                                                                                           |
| <b>534.6x</b> | 534.60 Chronic or unspecified gastrojejunal ulcer with hemorrhage and perforation, without mention of obstruction<br>534.61 Chronic or unspecified gastrojejunal ulcer with hemorrhage and perforation, with obstruction                                                                            |
| <b>535.01</b> | Acute gastritis, with hemorrhage                                                                                                                                                                                                                                                                    |
| <b>535.11</b> | Atrophic gastritis, with hemorrhage                                                                                                                                                                                                                                                                 |
| <b>535.21</b> | Gastric mucosal hypertrophy, with hemorrhage                                                                                                                                                                                                                                                        |
| <b>535.31</b> | Alcoholic gastritis, with hemorrhage                                                                                                                                                                                                                                                                |
| <b>535.41</b> | Other specified gastritis, with hemorrhage                                                                                                                                                                                                                                                          |
| <b>535.51</b> | Unspecified gastritis and gastroduodenitis, with hemorrhage                                                                                                                                                                                                                                         |
| <b>535.61</b> | Duodenitis, with hemorrhage                                                                                                                                                                                                                                                                         |
| <b>535.71</b> | Eosinophilic gastritis, with hemorrhage                                                                                                                                                                                                                                                             |
| <b>562.02</b> | Diverticulosis of small intestine with hemorrhage                                                                                                                                                                                                                                                   |
| <b>562.03</b> | Diverticulitis of small intestine with hemorrhage                                                                                                                                                                                                                                                   |
| <b>562.12</b> | Diverticulosis of colon with hemorrhage                                                                                                                                                                                                                                                             |
| <b>562.13</b> | Diverticulitis of colon with hemorrhage                                                                                                                                                                                                                                                             |
| <b>568.81</b> | Hemoperitoneum (nontraumatic)                                                                                                                                                                                                                                                                       |
| <b>569.3</b>  | Hemorrhage of rectum and anus                                                                                                                                                                                                                                                                       |
| <b>578.x</b>  | 578.0 Hematemesis<br>578.1 Blood in stool<br>578.9 Hemorrhage of gastrointestinal tract, unspecified                                                                                                                                                                                                |
| <b>596.7</b>  | Hemorrhage into bladder wall                                                                                                                                                                                                                                                                        |
| <b>599.7x</b> | 599.70 Hematuria, unspecified                                                                                                                                                                                                                                                                       |

|               |                                                                                                                  |
|---------------|------------------------------------------------------------------------------------------------------------------|
|               | 599.71 Gross hematuria                                                                                           |
|               | 599.72 Microscopic hematuria                                                                                     |
| <b>602.1</b>  | Congestion or hemorrhage of prostate                                                                             |
| <b>608.82</b> | Hematospermia                                                                                                    |
| <b>620.7</b>  | Hematoma of broad ligament                                                                                       |
| <b>621.4</b>  | Hematometra                                                                                                      |
| <b>624.5</b>  | Hematoma of vulva                                                                                                |
| <b>626.3</b>  | Puberty bleeding                                                                                                 |
| <b>626.5</b>  | Ovulation bleeding                                                                                               |
| <b>626.6</b>  | Metrorrhagia                                                                                                     |
| <b>626.7</b>  | Postcoital bleeding                                                                                              |
| <b>626.8</b>  | Other disorders of menstruation and other abnormal bleeding from female genital tract                            |
| <b>626.9</b>  | Unspecified disorders of menstruation and other abnormal bleeding from female genital tract                      |
| <b>627.0</b>  | Premenopausal menorrhagia                                                                                        |
| <b>627.1</b>  | Postmenopausal bleeding                                                                                          |
| <b>629.0</b>  | Hematocele, female, not elsewhere classified                                                                     |
| <b>634.1x</b> | 634.10 Spontaneous abortion, unspecified, complicated by delayed or excessive hemorrhage                         |
|               | 634.11 Spontaneous abortion, incomplete, complicated by delayed or excessive hemorrhage                          |
|               | 634.12 Spontaneous abortion, complete, complicated by delayed or excessive hemorrhage                            |
| <b>635.1x</b> | 635.10 Legally induced abortion, unspecified, complicated by delayed or excessive hemorrhage                     |
|               | 635.11 Legally induced abortion, incomplete, complicated by delayed or excessive hemorrhage                      |
|               | 635.12 Legally induced abortion, complete, complicated by delayed or excessive hemorrhage                        |
| <b>636.1x</b> | 636.10 Illegally induced abortion, unspecified, complicated by delayed or excessive hemorrhage                   |
|               | 636.11 Illegally induced abortion, incomplete, complicated by delayed or excessive hemorrhage                    |
|               | 636.12 Illegally induced abortion, complete, complicated by delayed or excessive hemorrhage                      |
| <b>637.1</b>  | Unspecified abortion complicated by delayed or excessive hemorrhage                                              |
| <b>637.1x</b> | 637.10 Unspecified type of abortion, unspecified, complicated by delayed or excessive hemorrhage                 |
|               | 637.11 Unspecified abortion, incomplete, complicated by delayed or excessive hemorrhage                          |
|               | 637.12 Unspecified abortion, complete, complicated by delayed or excessive hemorrhage                            |
| <b>638.1</b>  | Failed attempted abortion complicated by delayed or excessive hemorrhage                                         |
| <b>639.1</b>  | Delayed or excessive hemorrhage following abortion or ectopic and molar pregnancies                              |
| <b>640.8x</b> | 640.80 Other specified hemorrhage in early pregnancy, unspecified as to episode of care or not applicable        |
|               | 640.81 Other specified hemorrhage in early pregnancy, delivered, with or without mention of antepartum condition |
|               | 640.83 Other specified hemorrhage in early pregnancy, antepartum condition or complication                       |
| <b>640.9x</b> | 640.90 Unspecified hemorrhage in early pregnancy, unspecified as to episode of care or not applicable            |
|               | 640.91 Unspecified hemorrhage in early pregnancy, delivered, with or without mention of antepartum condition     |

|               |                                                                                                                              |
|---------------|------------------------------------------------------------------------------------------------------------------------------|
| <b>641.1x</b> | 640.93 Unspecified hemorrhage in early pregnancy, antepartum condition or complication                                       |
|               | 641.10 Hemorrhage from placenta previa, unspecified as to episode of care or not applicable                                  |
|               | 641.11 Hemorrhage from placenta previa, delivered, with or without mention of antepartum condition                           |
| <b>641.3x</b> | 641.13 Hemorrhage from placenta previa, antepartum condition or complication                                                 |
|               | 641.30 Antepartum hemorrhage associated with coagulation defects, unspecified as to episode of care or not applicable        |
|               | 641.31 Antepartum hemorrhage associated with coagulation defects, delivered, with or without mention of antepartum condition |
|               | 641.33 Antepartum hemorrhage associated with coagulation defects, antepartum condition or complication                       |
| <b>641.8x</b> | 641.80 Other antepartum hemorrhage, unspecified as to episode of care or not applicable                                      |
|               | 641.81 Other antepartum hemorrhage, delivered, with or without mention of antepartum condition                               |
|               | 641.83 Other antepartum hemorrhage, antepartum condition or complication                                                     |
| <b>641.9x</b> | 641.90 Unspecified antepartum hemorrhage, unspecified as to episode of care or not applicable                                |
|               | 641.91 Unspecified antepartum hemorrhage, delivered, with or without mention of antepartum condition                         |
|               | 641.93 Unspecified antepartum hemorrhage, antepartum condition or complication                                               |
| <b>656.0x</b> | 656.00 Fetal-maternal hemorrhage affecting management of mother, unspecified as to episode of care or not applicable         |
|               | 656.01 Fetal-maternal hemorrhage affecting management of mother, delivered, with or without mention of antepartum condition  |
|               | 656.03 Fetal-maternal hemorrhage affecting management of mother, antepartum condition or complication                        |
| <b>665.7x</b> | 665.70 Obstetrical pelvic hematoma, unspecified as to episode of care or not applicable                                      |
|               | 665.71 Obstetrical pelvic hematoma, delivered, with or without mention of antepartum condition                               |
|               | 665.72 Obstetrical pelvic hematoma, delivered, with mention of postpartum complication                                       |
|               | 665.74 Obstetrical pelvic hematoma, postpartum condition or complication                                                     |
| <b>666.0x</b> | 666.00 Third-stage postpartum hemorrhage, unspecified as to episode of care or not applicable                                |
|               | 666.02 Third-stage postpartum hemorrhage, delivered, with mention of postpartum complication                                 |
|               | 666.04 Third-stage postpartum hemorrhage, postpartum condition or complication                                               |
| <b>666.1x</b> | 666.10 Other immediate postpartum hemorrhage, unspecified as to episode of care or not applicable                            |
|               | 666.12 Other immediate postpartum hemorrhage, delivered, with mention of postpartum complication                             |
|               | 666.14 Other immediate postpartum hemorrhage, postpartum condition or complication                                           |
| <b>666.2x</b> | 666.20 Delayed and secondary postpartum hemorrhage, unspecified as to episode of care or not applicable                      |
|               | 666.22 Delayed and secondary postpartum hemorrhage, delivered, with mention of postpartum complication                       |
|               | 666.24 Delayed and secondary postpartum hemorrhage, postpartum condition or complication                                     |
| <b>719.1x</b> | 719.10 Hemarthrosis, site unspecified                                                                                        |
|               | 719.11 Hemarthrosis involving shoulder region                                                                                |
|               | 719.12 Hemarthrosis involving upper arm                                                                                      |

|               |                                                                                                                            |
|---------------|----------------------------------------------------------------------------------------------------------------------------|
|               | 719.13 Hemarthrosis involving forearm                                                                                      |
|               | 719.14 Hemarthrosis involving hand                                                                                         |
|               | 719.15 Hemarthrosis involving pelvic region and thigh                                                                      |
|               | 719.16 Hemarthrosis involving lower leg                                                                                    |
|               | 719.17 Hemarthrosis involving ankle and foot                                                                               |
|               | 719.18 Hemarthrosis involving other specified sites                                                                        |
|               | 719.19 Hemarthrosis involving multiple sites                                                                               |
| <b>762.1</b>  | Other forms of placental separation and hemorrhage affecting fetus or newborn                                              |
| <b>767.11</b> | Epicranial subaponeurotic hemorrhage (massive)                                                                             |
| <b>770.3</b>  | Pulmonary hemorrhage of fetus or newborn                                                                                   |
| <b>772.1x</b> | 772.10 Intraventricular hemorrhage, unspecified grade                                                                      |
|               | 772.11 Intraventricular hemorrhage, Grade I                                                                                |
|               | 772.12 Intraventricular hemorrhage, Grade II                                                                               |
|               | 772.13 Intraventricular hemorrhage, Grade III                                                                              |
|               | 772.14 Intraventricular hemorrhage, Grade IV                                                                               |
| <b>772.2</b>  | Subarachnoid hemorrhage of newborn                                                                                         |
| <b>772.3</b>  | Umbilical hemorrhage after birth                                                                                           |
| <b>772.4</b>  | Gastrointestinal hemorrhage of fetus or newborn                                                                            |
| <b>772.6</b>  | Cutaneous hemorrhage of fetus or newborn                                                                                   |
| <b>772.8</b>  | Other specified hemorrhage of fetus or newborn                                                                             |
| <b>772.9</b>  | Unspecified hemorrhage of newborn                                                                                          |
| <b>777.3</b>  | Hematemesis and melena due to swallowed maternal blood of newborn                                                          |
| <b>782.7</b>  | Spontaneous ecchymoses                                                                                                     |
| <b>784.7</b>  | Epistaxis                                                                                                                  |
| <b>784.8</b>  | Hemorrhage from throat                                                                                                     |
| <b>786.3</b>  | Hemoptysis                                                                                                                 |
| <b>791.2</b>  | Hemoglobinuria                                                                                                             |
| <b>800.2x</b> | Fracture of vault of skull, closed with subarachnoid, subdural, and extradural hemorrhage                                  |
| <b>800.3x</b> | Fracture of vault of skull, closed with other and unspecified intracranial hemorrhage                                      |
| <b>800.7x</b> | Fracture of vault of skull, open with subarachnoid, subdural, and extradural hemorrhage                                    |
| <b>800.8x</b> | Fracture of vault of skull, open with other and unspecified intracranial hemorrhage                                        |
| <b>801.2x</b> | Fracture of base of skull, closed with subarachnoid, subdural, and extradural hemorrhage                                   |
| <b>801.3x</b> | Fracture of base of skull, closed with other and unspecified intracranial hemorrhage                                       |
| <b>801.7x</b> | Fracture of base of skull, open with subarachnoid, subdural, and extradural hemorrhage                                     |
| <b>801.8x</b> | Fracture of base of skull, open with other and unspecified intracranial hemorrhage                                         |
| <b>803.2x</b> | Other and unqualified skull fractures, closed with subarachnoid, subdural, and extradural hemorrhage                       |
| <b>803.3x</b> | Other and unqualified skull fractures, closed with other and unspecified intracranial hemorrhage                           |
| <b>803.7x</b> | Other and unqualified skull fractures, open with subarachnoid, subdural, and extradural hemorrhage                         |
| <b>803.8x</b> | Other and unqualified skull fractures, open with other and unspecified intracranial hemorrhage                             |
| <b>804.2x</b> | Multiple fractures involving skull or face with other bones, closed with subarachnoid, subdural, and extradural hemorrhage |
| <b>804.3x</b> | Multiple fractures involving skull or face with other bones, closed with other and unspecified intracranial hemorrhage     |
| <b>804.7x</b> | Multiple fractures involving skull or face with other bones, open with subarachnoid, subdural, and extradural hemorrhage   |
| <b>804.8x</b> | Multiple fractures involving skull or face with other bones, open with other and unspecified intracranial hemorrhage       |

|                       |                                                                                             |
|-----------------------|---------------------------------------------------------------------------------------------|
| 852.xx                | Subarachnoid, subdural, and extradural hemorrhage, following injury                         |
| 853.xx                | Other and unspecified intracranial hemorrhage following injury                              |
| 864.01                | Hematoma and contusion of liver without mention of open wound into cavity                   |
| 864.11                | Hematoma and contusion of liver with open wound into cavity                                 |
| 865.01                | Hematoma of spleen, without rupture of capsule, without mention of open wound into cavity   |
| 865.11                | Hematoma of spleen, without rupture of capsule, with open wound into cavity                 |
| 866.01                | Hematoma of kidney, without rupture of capsule, without mention of open wound into cavity   |
| 866.11                | Hematoma of kidney, without rupture of capsule, with open wound into cavity                 |
| 997.02                | Iatrogenic cerebrovascular infarction or hemorrhage                                         |
| 998.11                | Hemorrhage complicating a procedure                                                         |
| 998.12                | Hematoma complicating a procedure                                                           |
| <b>Rescue therapy</b> |                                                                                             |
| <b>HCPCS / CPT</b>    | <b>Immunoglobulins</b>                                                                      |
| 90283                 | Immune globulin (IgIV), human, for intravenous use                                          |
| 90386                 | Rho(D) immune globulin, human, for intravenous use                                          |
| C9270                 | Injection, immune globulin (Gammaplex), intravenous, non-lyophilized, 500 mg                |
| J1459                 | Injection, immune globulin (Privigen), intravenous, nonlyophilized, 500 mg                  |
| J1557                 | Injection, immune globulin (Gammaplex), intravenous, nonlyophilized, 500 mg                 |
| J1559                 | Injection, immune globulin (Hizentra), 100 mg                                               |
| J1561                 | Injection, immune globulin (Gamunex), intravenous, non-lyophilized, 500 mg                  |
| J1562                 | Injection, immune globulin (Vivaglobin), 100 mg                                             |
| J1563                 | Injection, immune globulin, intravenous, 1g                                                 |
| J1564                 | Injection, immune globulin, intravenous, 10 mg                                              |
| J1566                 | Injection, immune globulin, intravenous, lyophilized, not otherwise specified, 500 mg       |
| J1567                 | Injection, immune globulin, intravenous, non-lyophilized, 500 mg                            |
| J1568                 | Injection, immune globulin (Octagam), intravenous, non-lyophilized, 500 mg                  |
| J1569                 | Injection, immune globulin (Gammagard liquid), intravenous, non-lyophilized, 500 mg         |
| J1572                 | Injection, immune globulin (Flebogamma), intravenous, non-lyophilized, 500 mg               |
| J1599                 | Injection, immune globulin, intravenous, non-lyophilized, not otherwise specified, 500 mg   |
| J2788                 | Injection, Rho(D) immune globulin, human, minidose, 50 mcg                                  |
| J2790                 | Injection, Rho(D) immune globulin, human, full dose, 300 mcg                                |
| J2791                 | Injection, Rho(D) immune globulin (human) (Rhophylac), intramuscular or intravenous, 100 IU |
| J2792                 | Injection, Rho(D) immune globulin, intravenous, human, solvent detergent, 100 IU            |
| Q4087                 | Injection, immune globulin (Octagam), intravenous, non-lyophilized, 500 mg                  |
| Q4088                 | Injection, immune globulin (Gammagard liquid), intravenous, non-lyophilized, 500 mg         |
| Q4089                 | Injection, Rho(D) immune globulin (human) (Rhophylac), intramuscular or intravenous, 100 IU |
| Q4091                 | Injection, immune globulin (Flebogamma), intravenous, non-lyophilized, 500 mg               |
| Q4092                 | Injection, immune globulin (Gamunex), intravenous, non-lyophilized, 500 mg                  |
| Q4097                 | Injection, immune globulin (Privigen), intravenous, non-lyophilized                         |
| Q9941                 | Injection, immune globulin, intravenous, lyophilized, 1g                                    |
| Q9942                 | Injection, immune globulin, intravenous, lyophilized, 10 mg                                 |
| Q9943                 | Injection, immune globulin, intravenous, non-lyophilized, 1g                                |
| Q9944                 | Injection, immune globulin, intravenous, non-lyophilized, 10 mg                             |
| <b>ICD-9-CM</b>       |                                                                                             |
| 99.11                 | Injection of Rh immune globulin                                                             |
| 99.14                 | Injection or infusion of gamma globulin                                                     |



|                       |                                                                               |
|-----------------------|-------------------------------------------------------------------------------|
| <b>HCPCS / CPT</b>    | <b>Steroids</b>                                                               |
| <b>J1020</b>          | Injection, methylprednisolone acetate, 20 mg                                  |
| <b>J1030</b>          | Injection, methylprednisolone acetate, 40 mg                                  |
| <b>J1040</b>          | Injection, methylprednisolone acetate, 80 mg                                  |
| <b>J1094</b>          | Injection, dexamethasone acetate, 1 mg                                        |
| <b>J1100</b>          | Injection, dexamethasone sodium phosphate, 1 mg                               |
| <b>J1700</b>          | Injection, hydrocortisone acetate, up to 25 mg                                |
| <b>J1710</b>          | Injection, hydrocortisone sodium phosphate, up to 50 mg                       |
| <b>J1720</b>          | Injection, hydrocortisone sodium succinate, up to 100 mg                      |
| <b>J2650</b>          | Injection, prednisolone acetate, up to 1 ml                                   |
| <b>J2920</b>          | Injection, methylprednisolone sodium succinate, up to 40 mg                   |
| <b>J2930</b>          | Injection, methylprednisolone sodium succinate, up to 125 mg                  |
| <b>J3300</b>          | Injection, triamcinolone acetonide, preservative free, 1 mg                   |
| <b>J3301</b>          | Injection, triamcinolone acetonide, not otherwise specified, 10 mg            |
| <b>J3302</b>          | Injection, triamcinolone diacetate, per 5 mg                                  |
| <b>J3303</b>          | Injection, triamcinolone hexacetonide, per 5 mg                               |
| <b>ICD-9-CM 99.23</b> | Injection of steroid                                                          |
| <b>HCPCS / CPT</b>    | <b>Platelets</b>                                                              |
| <b>P9019</b>          | Platelets, each unit                                                          |
| <b>P9020</b>          | Platelet rich plasma, each unit                                               |
| <b>P9031</b>          | Platelets, leukocytes reduced , each unit                                     |
| <b>P9032</b>          | Platelets, irradiated, each unit                                              |
| <b>P9033</b>          | Platelets, leukocytes reduced, irradiated, each unit                          |
| <b>P9034</b>          | Platelets, pheresis, each unit                                                |
| <b>P9035</b>          | Platelets, pheresis, leukocytes reduced, each unit                            |
| <b>P9036</b>          | Platelets, pheresis, irradiated, each unit                                    |
| <b>P9037</b>          | Platelets, pheresis, leukocytes reduced, irradiated, each unit                |
| <b>P9052</b>          | Platelets, HLA-matched leukocytes reduced, apheresis/pheresis, each unit      |
| <b>P9053</b>          | Platelets, pheresis, leukocytes reduced, CMV-negative, irradiated , each unit |
| <b>P9055</b>          | Platelet, leukocytes reduced, CMV-negative, apheresis/pheresis, each unit     |
| <b>ICD-9-CM 99.05</b> | Transfusion of platelets                                                      |

CMV: cytomegalovirus; CPT: Current Procedural Terminology; g: gram; HCPCS: Healthcare Common Procedure Coding System; HLA: human leukocyte antigen; ICD-9-CM: International Classification of Diseases, 9<sup>th</sup> Revision, Clinical Modification; Ig: immunoglobulin; IU: International unit; IV: intravenous; mcg: microgram; mg: milligram

**Table S4.** Codes used to identify patients who underwent splenectomy

|                                                                                               |                                                                                                                                                                         |
|-----------------------------------------------------------------------------------------------|-------------------------------------------------------------------------------------------------------------------------------------------------------------------------|
| <b>CPT</b><br><b>38100</b><br><b>38102</b><br><b>38120</b>                                    | Splenectomy; total (separate procedure)<br>Splenectomy; total, en bloc for extensive disease, in conjunction with other procedure<br>Laparoscopy, surgical, splenectomy |
| <b>ICD-9</b><br><b>41.5</b>                                                                   | Total splenectomy                                                                                                                                                       |
| <b>DRG</b><br><b>393 (before 10/01/2007)</b><br><b>799, 800, &amp; 801 (after 10/01/2007)</b> | Splenectomy<br>Splenectomy                                                                                                                                              |

CPT: Current Procedural Terminology; DRG: Diagnosis-Related Group; ICD-9: International Classification of Diseases, 9<sup>th</sup> Revision

**Table S5.** Conditions and codes used to calculate the comorbidity index score

|                                                                                                                                                                                                                                                                                                                                                                                                                                                                                                                                                                                                                                                                                                                      |                                                                                                                                                                                                                                                                                                                                                                                                                                                                                                                                                                                                                                                                                                                                                                                                                                                                                                                                                                                                                                                                                                                                                                                                                                                                                                                                                                                                                                                                                                                                                                                                                                                                                                                                                                                                                                                                                                                                                                                                                                                                                                                                                                                               |
|----------------------------------------------------------------------------------------------------------------------------------------------------------------------------------------------------------------------------------------------------------------------------------------------------------------------------------------------------------------------------------------------------------------------------------------------------------------------------------------------------------------------------------------------------------------------------------------------------------------------------------------------------------------------------------------------------------------------|-----------------------------------------------------------------------------------------------------------------------------------------------------------------------------------------------------------------------------------------------------------------------------------------------------------------------------------------------------------------------------------------------------------------------------------------------------------------------------------------------------------------------------------------------------------------------------------------------------------------------------------------------------------------------------------------------------------------------------------------------------------------------------------------------------------------------------------------------------------------------------------------------------------------------------------------------------------------------------------------------------------------------------------------------------------------------------------------------------------------------------------------------------------------------------------------------------------------------------------------------------------------------------------------------------------------------------------------------------------------------------------------------------------------------------------------------------------------------------------------------------------------------------------------------------------------------------------------------------------------------------------------------------------------------------------------------------------------------------------------------------------------------------------------------------------------------------------------------------------------------------------------------------------------------------------------------------------------------------------------------------------------------------------------------------------------------------------------------------------------------------------------------------------------------------------------------|
| <p><b>ICD-9-CM</b><br/> <b>410-410.9; 412</b><br/> <b>428-428.9</b><br/> <b>443.9; 441-441.9; 785.4;</b><br/> <b>V43.4; procedure 38.48</b></p> <p><b>430-438</b><br/> <b>290-290.9</b><br/> <b>490-496; 500-505; 506.4</b></p> <p><b>710.0; 710.1; 710.4; 714.0-</b><br/> <b>714.2; 714.81; 725</b></p> <p><b>531-534.9</b></p> <p><b>571.2; 571.5; 571.6; 571.4-</b><br/> <b>571.49</b><br/> <b>250-250.3; 250.7</b></p> <p><b>344.1; 342-342.9</b><br/> <b>582-582.9; 583-583.9; 585;</b><br/> <b>586; 588-588.9</b></p> <p><b>250.4-250.6</b></p> <p><b>140-172.9; 174-195.8</b></p> <p><b>200-203.8</b><br/> <b>204-208.9</b><br/> <b>572.2-572.8; 456-456.21</b></p> <p><b>196-199.1</b></p> <p><b>042</b></p> | <p>Acute myocardial infarction; old myocardial infarction<br/> Heart failure<br/> Peripheral vascular disease, unspecified; aortic aneurysm and dissection; gangrene; blood vessel replaced; resection and replacement of lower limb arteries<br/> Cerebrovascular disease<br/> Dementias<br/> Chronic obstructive pulmonary disease and allied conditions; pneumoconioses; chronic respiratory conditions due to fumes and vapors<br/> Systemic lupus erythematosus; systemic sclerosis; polymyositis; rheumatoid arthritis, Felty's syndrome, and other rheumatoid arthritis with visceral or systemic involvement; rheumatoid lung; polymyalgia rheumatica<br/> Gastric ulcer, duodenal ulcer, peptic ulcer site unspecified, and gastrojejunal ulcer<br/> Alcoholic cirrhosis of liver; cirrhosis of liver without mention of alcohol; biliary cirrhosis; chronic hepatitis<br/> Diabetes mellitus without mention of complication, diabetes with ketoacidosis, diabetes with hyperosmolarity, and diabetes with other coma; diabetes with peripheral circulatory disorders<br/> Paraplegia; hemiplegia and hemiparesis<br/> Chronic glomerulonephritis; nephritis and nephropathy; chronic kidney disease; renal failure, unspecified; disorders resulting from impaired renal function<br/> Diabetes with renal manifestations, diabetes with ophthalmic manifestations, and diabetes with neurological manifestations<br/> Neoplasms (excluding malignant neoplasm of skin other than melanoma and excluding lymphoma and leukemia)<br/> Lymphoma<br/> Leukemia<br/> Hepatic coma, portal hypertension, hepatorenal syndrome, and other sequelae of chronic liver disease; esophageal varices with bleeding, esophageal varices without mention of bleeding, and esophageal varices in diseases classified elsewhere<br/> Secondary and unspecified malignant neoplasm of lymph nodes, secondary malignant neoplasm of respiratory and digestive systems, secondary malignant neoplasm of other specified sites, and malignant neoplasm of other and unspecified sites (excluding malignant neoplasm associated with transplanted organ)<br/> Human immunodeficiency virus disease</p> |
|----------------------------------------------------------------------------------------------------------------------------------------------------------------------------------------------------------------------------------------------------------------------------------------------------------------------------------------------------------------------------------------------------------------------------------------------------------------------------------------------------------------------------------------------------------------------------------------------------------------------------------------------------------------------------------------------------------------------|-----------------------------------------------------------------------------------------------------------------------------------------------------------------------------------------------------------------------------------------------------------------------------------------------------------------------------------------------------------------------------------------------------------------------------------------------------------------------------------------------------------------------------------------------------------------------------------------------------------------------------------------------------------------------------------------------------------------------------------------------------------------------------------------------------------------------------------------------------------------------------------------------------------------------------------------------------------------------------------------------------------------------------------------------------------------------------------------------------------------------------------------------------------------------------------------------------------------------------------------------------------------------------------------------------------------------------------------------------------------------------------------------------------------------------------------------------------------------------------------------------------------------------------------------------------------------------------------------------------------------------------------------------------------------------------------------------------------------------------------------------------------------------------------------------------------------------------------------------------------------------------------------------------------------------------------------------------------------------------------------------------------------------------------------------------------------------------------------------------------------------------------------------------------------------------------------|

ICD-9-CM: International Classification of Diseases, 9<sup>th</sup> Revision, Clinical Modification
